# Supplementary material
Source: PubMed Central journal article supplement (PMC4304976)

**A**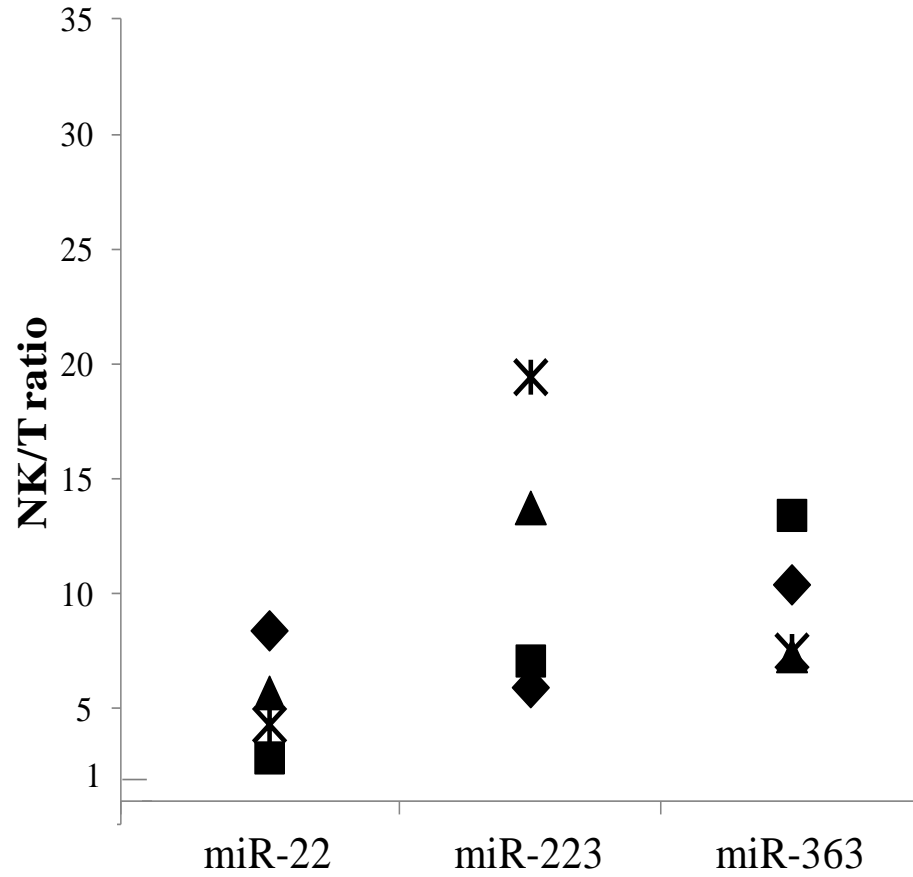**B**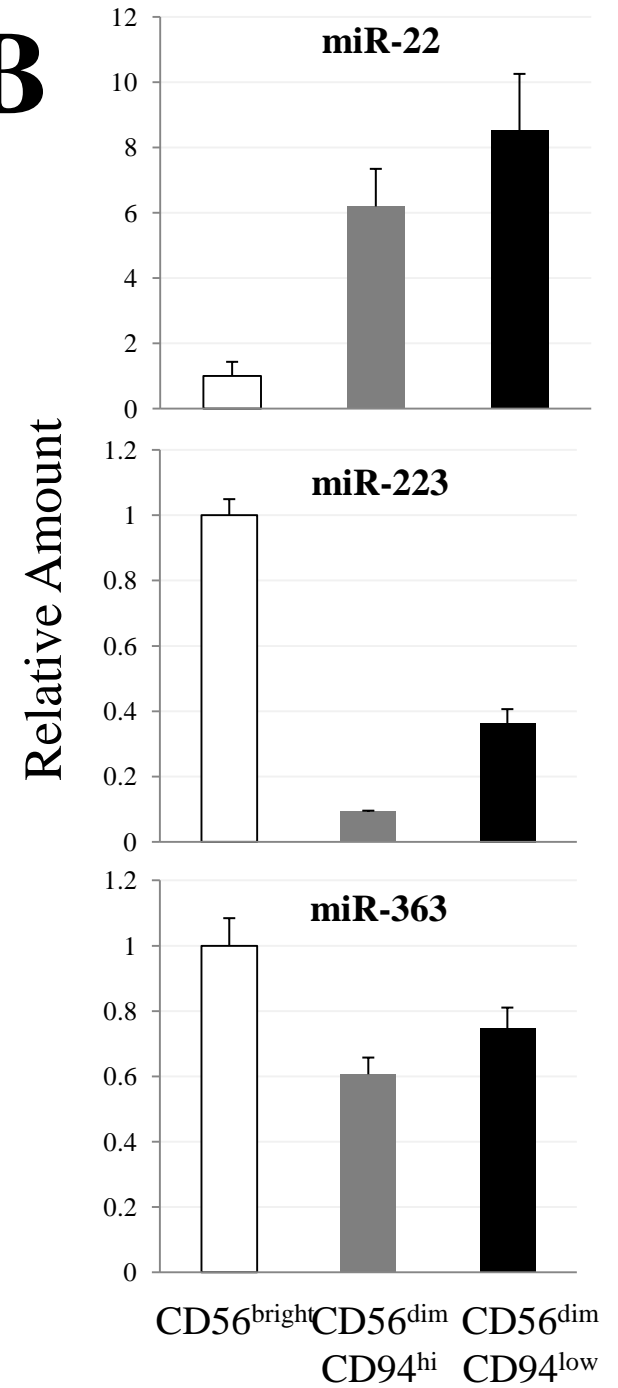

Supplement: NIHMS634678-supplement-2.pdf [file NIHMS634678-supplement-2.pdf]
